# Supplementary material
Source: Springer Nature journal article supplement (https://www.springermedizin.de/resource/supplementary/12889_2010_2338_MOESM1_ESM.pdf/9485444)
Supplement: MOESM1 [file 9485444]

**DATA COLLECTION**

**TOPICS COVERED IN GUIDELINES**

Differences between denominations  
Role of churches in HIV  
Opportunities of collaboration

**EMERGING TOPICS**

Devil vs. God  
Miracles  
Links with traditional healers

**HYPOTHESIS TESTING**

Relationship codes  
Direct Observation  
Active search of “negative cases”  
Triangulation of interpretations

**DATA ANALYSIS**
